# Supplementary material
Source: ML conference proceedings conference paper supplement (https://openreview.net/forum?id=frMCrXOioZ)
Supplement: supplementary_material [file MindVL_ICLR2026_appendix.pdf › MindVL_ICLR2026_appendix.pdf]

## A MINDSPEED-MLLM

### A.1 ASCEND V.S. NVIDIA

Table 9: Comparison Between NVIDIA CUDA and Ascend CANN.

| Component                        | CUDA                      | CANN                    |
|----------------------------------|---------------------------|-------------------------|
| GE Graph Engine                  | TensorRT plugins & parser | Graph Engine            |
| Collective Communication Library | NV NCCL                   | HCCL                    |
| Library/Template                 | NV CUTLASS                | Ascend C High-Level API |
| General Programming              | NV CUDA-C                 | Ascend C Low-Level API  |
| Operator Acceleration Library    | NV cuDNN                  | Ascend aclNN            |
| Runtime                          | NV Runtime                | Ascend Runtime          |
| Driver                           | NV Driver                 | Ascend Driver           |

The ecosystem serves as the cornerstone of distributed pre-training frameworks, with NVIDIA’s CUDA and Huawei’s Ascend CANN being the two mainstream ecosystems. While both possess dedicated driver and runtime layers for OS-AI accelerator communication as illustrated in Table 9, they differ significantly in middle-level acceleration libraries, upper-level tools, and ecological maturity. NVIDIA’s cuDNN and NCCL are highly optimized, and with CUTLASS and TensorRT providing flexible programming templates and graph optimization, it has formed a mature “hardware-software-tools-community” loop, supported by in-depth adaptation of open source communities like those behind PyTorch and Megatron-LM.

In contrast, Ascend’s aclNN, HCCL, and two-tier Ascend C API system have realized core functions but lack coverage of long-tail operators, third-party tools, and community resources. This gap limits Ascend’s training framework selection—mainstream CUDA-based frameworks cannot directly leverage Ascend’s hardware capabilities, and simple adaptation incurs high costs and performance losses, highlighting the necessity of developing a dedicated framework for Ascend to integrate with CANN components seamlessly.

Table 10: Comparison of Differences Between Huawei Ascend and NVIDIA Computing Cards.

| XPU                     | A100 | A800 | H800 | 910B1 | 910B2 |
|-------------------------|------|------|------|-------|-------|
| TF32 (Tensor Core)      | 156  | 156  | 495  | 200   | 188   |
| FP32 (Tensor Core)      | NA   | NA   | NA   | 100   | 94    |
| BF16 (Tensor Core)      | 312  | 312  | 989  | 400   | 376   |
| FP16 (Tensor Core)      | 312  | 312  | 989  | 400   | 376   |
| Int8 (Tensor Core)      | 624  | 624  | 1979 | 800   | 752   |
| HBM (GB)                | 80   | 80   | 80   | 64    | 64    |
| HBM Bandwidth (GB/s)    | 2039 | 2039 | 3350 | 1800  | 1800  |
| NVLink Bandwidth (GB/s) | 600  | 400  | 600  | NA    | NA    |
| PCIe Bandwidth (GB/s)   | 64   | 64   | 128  | 64    | 64    |

Beyond underlying chip architecture differences, Ascend and NVIDIA computing cards vary distinctly in core specifications that impact large-model pre-training efficiency and stability as illustrated in 10. In terms of computing power, Ascend 910B shows competitiveness at mainstream precisions and unique advantages in FP32 Tensor Core support. However, Ascend has obvious shortcomings: 64 GB HBM risks training interruptions for ultra-large models, 1800 GB/s HBM bandwidth is lower than NVIDIA’s, and without NVLink, it relies on 64 GB/s PCIe for multi-card communication, increasing latency.

To mitigate these, hardware-friendly strategies are needed, which further drives Ascend-specific framework optimizations—such as developing fused operators, dynamic scheduling, and communication optimization to offset shortcomings and leverage its computing power.

## A.2 PRECISION ALIGNMENT

To verify the forward and backward precision of the developed framework, we conducted comparisons not only with the original MindSpeed-MM but also with the following mainstream training frameworks within the NVIDIA ecosystem:

Llama-FactoryZheng et al. (2024): an easy-to-use open-source training framework. It is mainly built on native PyTorch and the HuggingFace ecosystem, and supports distributed engines such as DeepSpeed and FSDP. Currently, its support for the Ascend ecosystem is becoming increasingly comprehensive.

Pai-Megatron-PatchCloud (Year): an open-source training tool developed by Alibaba. Similar to MindSpeed-LLM/MM, it includes adaptation and optimization based on Megatron for mainstream open-source LLMs.

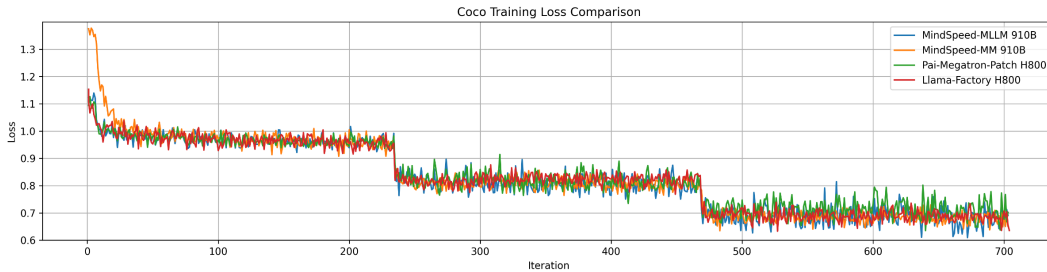

Figure 5: Comparison of loss values among various training tools and platforms on the COCO dataset.

Two datasets were employed to validate the accuracy of the training framework: the public COCO dataset(Lin et al., 2014) and an in-house Slow Thinking dataset. In all training experiments, consistent training hyper-parameters were maintained. Specifically, the training length was set to 4K for the COCO dataset, whereas a 12K training length was adopted for the Slow Thinking dataset.

Firstly, we checked the forward precision of the MindSpeed-MLLM. By manually feeding hundreds of identical inputs into MindSpeed-MLLM and the transformer-based forward code, the Mean Absolute Error (MAE) and Mean Relative Error (MRE) are both within five thousandths.

Next, we conducted precision checks through training tasks. In the COCO data set, as illustrated in Figure 5, the loss curves of all frameworks exhibited very similar trends, although with minor discrepancies. These differences are deemed acceptable, as the frameworks utilize distinct data loading modules and workflows.

To further validate consistency, we adapted our custom data loader to MindSpeed-MM, ensuring full alignment of the data load logic, and conducted comparative experiments on the in-house Slow Thinking dataset. As illustrated in Figures 6 and 7, after standardizing the data loading process, the loss values of MindSpeed-MLLM and MindSpeed-MM showed a near-perfect overlap, with the loss difference confined to within a percentile range. This marginal discrepancy is considered acceptable, given the inherent different associated with the fused operators employed, as well as the randomness with computation and communication processes.

In the final benchmark evaluation, under the same training set, the models trained using Llama-Factory and MindSpeed-MLLM respectively achieved comparable results on the general visual and text benchmarks, with an error margin within  $\pm 1.5$ .

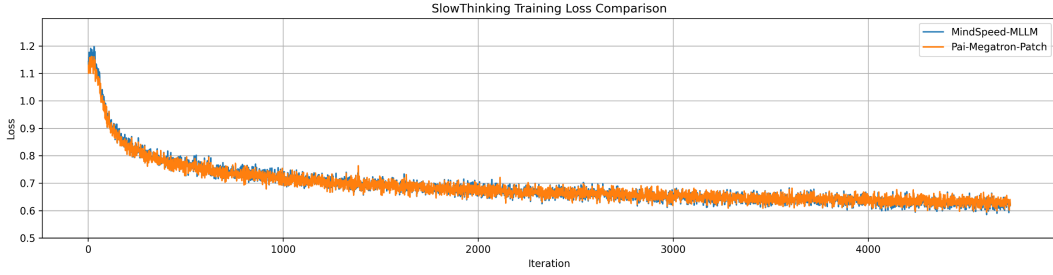

Figure 6: loss decline trend on the in-house slow thinking dataset.

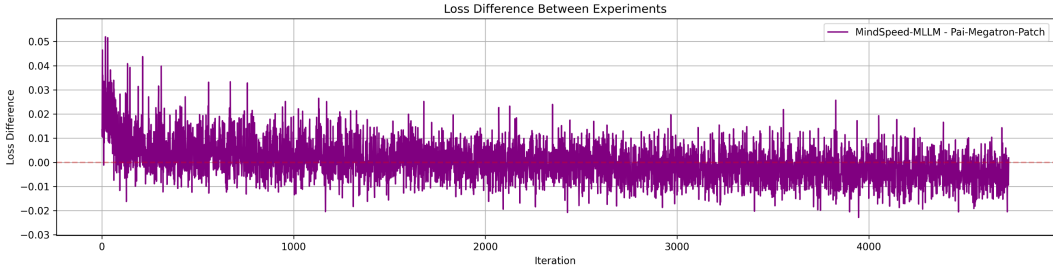

Figure 7: loss difference between MindSpeed-MLLM and the original MindSpeed-MM.

## B DATA CURATION

The MindVL training corpus contains 447 billion diverse and high-quality tokens used for three training stages. The data is categorized according to target capabilities, and the curation process for each category is detailed in the following subsections.

### B.1 WARM-UP DATA

The MindVL warm-up corpus contains 256 billion diverse, high-quality tokens, including Generic Image-Text Pairs, Optical Character Recognition (OCR), Visual Grounding & Counting, Science, Technology, Engineering, and Mathematics (STEM), and Graphical User Interface (GUI).

#### B.1.1 GENERIC IMAGE-TEXT PAIRS

Web-sourced image-text pairs, which include alt texts, captions, and surrounding contextual text, are now available at an unprecedented scale. With billions of examples, they showcase remarkable diversity across visual and textual concepts. However, such data is inherently noisy, often containing texts that are irrelevant or factually inaccurate relative to the corresponding images, and it frequently exhibits class imbalance.

To address these challenges, we have adopted a series of filtering measures, including image-based criteria, text-based criteria, aesthetic scoring, pornography and violence scoring, watermark scoring, CLIP scoring (Radford et al., 2021), and URL filtering. For data with inadequate image-text relevance, we use a model (Bai et al., 2025; Chen et al., 2024) to recapture the images.

Furthermore, to cover more visual concepts and preserve as many types of long-tail visual concepts as possible, we perform clustering on the images within the filtered image-text pairs. We then manually inspect the data in each cluster and map these clusters to the data’s category labels. For clusters that represent overly broad concepts, we conduct re-clustering. Finally, we obtain the results of hierarchical clustering: a larger variance within a cluster indicates greater diversity. We perform data sampling based on variance—clusters with larger variance undergo more extensive sampling, while clusters with smaller variance are sampled less.

Table 11: Warm-up Phase Dataset Composition

| Category                        | Dataset               | Total Num          | Percentage (%) |
|---------------------------------|-----------------------|--------------------|----------------|
| Caption                         | Caption-CN-Rawcaption | 132,900,000        | 21.92          |
| Caption                         | Caption-EN-Recaption  | 102,500,000        | 16.90          |
| Caption                         | Caption-EN-Rawcaption | 42,041,409         | 6.93           |
| Caption                         | CapsFusion-en         | 35,840,000         | 5.91           |
| Caption                         | Caption-CN-Recaption  | 25,300,000         | 4.17           |
| Caption                         | HiVision              | 1,800,000          | 0.30           |
| <b>Caption Subtotal</b>         |                       | <b>338,381,409</b> | <b>55.81</b>   |
| Grounding                       | UMG-en                | 42,240,000         | 6.97           |
| Grounding                       | Grounding             | 35,000,000         | 5.77           |
| Grounding                       | UMG-zh                | 14,080,000         | 2.32           |
| Grounding                       | GRIT-en               | 8,448,000          | 1.39           |
| <b>Grounding Subtotal</b>       |                       | <b>99,768,000</b>  | <b>16.45</b>   |
| OCR                             | WuKong-Text-zh        | 33,280,000         | 5.49           |
| OCR                             | LAION-Text-en         | 14,336,000         | 2.36           |
| OCR                             | Document-OCR          | 17,000,000         | 2.80           |
| OCR                             | Scene-OCR             | 17,000,000         | 2.80           |
| OCR                             | IIT-CDIP-en           | 3,840,000          | 0.63           |
| OCR                             | Rendered-Text-en      | 1,920,000          | 0.32           |
| OCR                             | PDF-en                | 2,560,000          | 0.42           |
| OCR                             | PDF-zh                | 2,560,000          | 0.42           |
| OCR                             | arXiv-en              | 2,304,000          | 0.38           |
| OCR                             | DOCX-en               | 960,000            | 0.16           |
| OCR                             | DOCX-zh               | 960,000            | 0.16           |
| OCR                             | README                | 1,280,000          | 0.21           |
| OCR                             | Scene-Text            | 560,000            | 0.09           |
| <b>OCR Subtotal</b>             |                       | <b>98,000,000</b>  | <b>16.16</b>   |
| Table&Chart                     | Table-Data            | 10,000,000         | 1.65           |
| Table&Chart                     | Chart-SFT-en          | 1,440,000          | 0.24           |
| Table&Chart                     | PubTables-en          | 120,000            | 0.02           |
| Table&Chart                     | PubTables-zh          | 120,000            | 0.02           |
| Table&Chart                     | MMC-Align-en          | 420,000            | 0.07           |
| Table&Chart                     | MMC-Instruct-en       | 420,000            | 0.07           |
| <b>Table&amp;Chart Subtotal</b> |                       | <b>12,520,000</b>  | <b>2.06</b>    |
| STEM                            | STEM-Caption-0729-en  | 2,230,000          | 0.37           |
| STEM                            | STEM-Caption-0729-zh  | 2,230,000          | 0.37           |
| STEM                            | STEM-Shuffle          | 1,000,000          | 0.16           |
| <b>STEM Subtotal</b>            |                       | <b>5,460,000</b>   | <b>0.90</b>    |
| GUI                             | Screen-UI-zh          | 360,000            | 0.06           |
| GUI                             | Screen-UI-en          | 120,000            | 0.02           |
| GUI                             | Screen-QA-zh          | 120,000            | 0.02           |
| GUI                             | Screen-Ref-zh         | 120,000            | 0.02           |
| GUI                             | Screen-Navi-zh        | 120,000            | 0.02           |
| <b>GUI Subtotal</b>             |                       | <b>840,000</b>     | <b>0.14</b>    |
| <b>Total</b>                    |                       | <b>606,221,409</b> | <b>100.00</b>  |

### B.1.2 OPTICAL CHARACTER RECOGNITION (OCR)

OCR data consists of two types, document OCR data and scene OCR data, each following a structured processing workflow. For document OCR data, the process starts with acquiring and initially screening source PDF data, then processes PDFs page-by-page via a pipeline to generate image-text pairs and image-text interleaved formats. After extracting these data (with image markers removed from pair data and text-only MD files filtered from interleaved data), rule-based cleaning addresses issues like garbled characters or abnormal spaces. For scene OCR data, pre-processed tar packages are first sent to the Focus OCR model (Liu et al., 2024b) to generate OCR results; the same tar packages are then processed by the PaddleOCR model (Cui et al., 2025), with results from both models intersected to form production-line OCR results. In addition to the aforementioned process, we have also calculated the coverage rate of words and characters in OCR text, and conducted targeted supplementation for data with relatively low coverage. In addition, we have also incorporated data such as small-language content, ancient books, and calligraphy works.

### B.1.3 TABLE & CHART

For raw tables, we perform layout detection and content recognition separately. Specifically, we use the RapidTable (Team) and LORE (Xing et al., 2023; Long et al., 2025) models for layout detection and layout judgment, and PaddleOCR for content recognition. Subsequently, we integrate the results and conduct post-processing for HTML formatting. Finally, we convert the table images into HTML format. Alongside the previously mentioned data, we also collect open data to enhance the ability to interpret tables and charts. For tables, we use the PubTables-1M dataset (Smock et al., 2022), including both its original English version and a translated Chinese version, to gather table recognition data. For charts, we employ chart-to-table conversion and chart-based QA data from existing datasets, including MMC (Liu et al., 2023) and ChartSFT (Meng et al., 2024).

### B.1.4 VISUAL GROUNDING

First, we perform recaptioning on the crawled and open-source images. We then use the Florence-2-large model (Xiao et al., 2024) to conduct caption to phrase grounding processing. After obtaining object bounding boxes and region captions, we employ SAM (Kirillov et al., 2023) to generate point annotations. In addition, we utilize GrIT-20M (Peng et al., 2023), a synthetic caption dataset with additional location labels for major visual elements, to enhance the grounding capability. We incorporate referring and grounding data from UMG-41M (Shi et al., 2024). Specifically, each region is randomly assigned to either a referring task or a grounding task. In the referring task, we provide the model with a bounding box to generate a caption for that specific region, while in the grounding task, we reverse this by using the caption to predict the corresponding bounding box.

### B.1.5 SCIENCE, TECHNOLOGY, ENGINEERING, AND MATHEMATICS (STEM)

To enhance the model’s disciplinary knowledge, we incorporated a diverse collection of data across various STEM domains, obtained through both crawling and manual annotation. We referred to the disciplinary classifications of MMMU (Yue et al., 2024) and K12, extracted such data from a vast volume of PDFs, and also collected publicly available data. Additionally, we used a model to re-annotate the sourced disciplinary images. Ultimately, we obtained nearly 5 million data samples.

### B.1.6 GRAPHICAL USER INTERFACE (GUI)

For GUI data processing, we first perform pre-annotation via GPT-4V (OpenAI, 2023), which involves tasks such as Referring&Grounding (for icons, text, and coitems), ScreenQA, and Navigation. Next, human verification is conducted by human annotators, focusing on Referring-coitem, QA, and the answers for Navigation. After that, a sequence of data post-processing operations is carried out: first, merging with original annotations; second, using UI-Hawk (Zhang et al., 2024b) and GLM-4V (GLM et al., 2024) to annotate referring-icon, and UI-Hawk to annotate navigation; third, employing GPT-4o (Hurst et al., 2024) to annotate Navigation actions; fourth, merging the results of these three models and performing consistency checks; finally, rewriting the answer style with Qwen2.5-7B-Instruct to ensure consistency and linguistic quality.

The data used during the warm-up phase is shown in the Table 11. Note that the "Total num" in the Table 11 is an approximate value. 606,221,409 samples are about 256B tokens. Apart from Caps-Fusion, UMG, GRIT, PubTables, ChartSFT, and MMC, all other datasets are either self-constructed or have undergone further processing of open-source data. The 16B tokens of data used in MindVL-671B-A37B are uniformly sampled from all warm-up datasets.

## B.2 MULTITASK TRAINING DATA

Multitask training data consists of interleaved image-text (Table 12), visual instruction (Table 14, about 80B tokens), web2code and text instruction (Table 13), totally 179B tokens.

### B.2.1 INTERLEAVED IMAGE-TEXT DATA

For interleaved image-text data, we primarily crawl Chinese websites, English websites, news websites, and Wikipedia from the internet. We then use model-based methods to filter the crawled data. First, we apply CLIP scores to filter the data according to image-text relevance. Next, we task the model with scoring the image-text interleaved data across multiple dimensions, including question-and-answer quality, relevance between images and questions, complementarity between answers, images and questions, and balance of information density. The model is also required to provide justifications for these scores. Finally, we use these scores to filter the image-text interleaved data.

Table 12: Data Statistics and Proportion of Interleaved Image-Text Data. "GPT4o" / "QWEN" denotes we use GPT4o / Qwen2.5-VL 72B filter the crawled data.

| Data Category | Single-image Count | Multi-image Count | Total Count     | Proportion (%) |
|---------------|--------------------|-------------------|-----------------|----------------|
| HTMLENGPT4o   | 2994750            | 2994750           | 5989500         | 12.24          |
| HTMLENQWEN    | 356942             | 356942            | 713884          | 1.46           |
| HTMLZHGPT4o   | 763016             | 763016            | 1526032         | 3.12           |
| HTMLZHQWEN    | 8096192            | 8096192           | 16192384        | 33.09          |
| OBELICSGPT4o  | 3339440            | 3339440           | 6678880         | 13.65          |
| News Webpages | 4167856            | 4167856           | 8335712         | 17.03          |
| Knowledge     | —                  | —                 | 7500000         | 15.33          |
| Wikiweb2m     | —                  | —                 | 2000000         | 4.09           |
| <b>Total</b>  | —                  | —                 | <b>48936392</b> | <b>100.00</b>  |

For other types of multitask training data, we have collected a wide range of open source data, as presented in Table 14. Within this dataset, we used Qwen2.5VL-72B to reannotate certain portions, such as those whose names begin with "Qwen". In addition, we also sampled some data from the warm-up phase and incorporated it into the training process at this stage. 200M web2code data is also used in this stage. Furthermore, we utilized language data produced by DeepSeek R1 to preserve the MLLM's linguistic abilities as shown in Table 13, with the ratio of multimodal to language data being approximately 8:2 at this stage.

Table 13: Data Statistics and Proportion of text instruction.

| Data Source             | Number         | Proportion (%) |
|-------------------------|----------------|----------------|
| Competition Mathematics | 345606         | 16.06          |
| Code                    | 113064         | 5.25           |
| Math                    | 296500         | 13.78          |
| General QA              | 1316361        | 61.18          |
| Tulu Instruction        | 19118          | 0.89           |
| Multi-turn Conversation | 61114          | 2.84           |
| <b>Total</b>            | <b>2151763</b> | <b>100.00</b>  |

Table 14: Data Statistics and Proportion of Visual Instruction

| No. | Data Set                       | Number | Percentage (%) |
|-----|--------------------------------|--------|----------------|
| 1   | Cauldron/ai2d                  | 2434   | 0.0064         |
| 2   | Cauldron/cocoqa                | 46287  | 0.1214         |
| 3   | Cauldron/datikz                | 47974  | 0.1258         |
| 4   | Cauldron/diagram-image-to-text | 300    | 0.0008         |
| 5   | Cauldron/docvqa                | 10189  | 0.0267         |
| 6   | Cauldron/dvqa                  | 199937 | 0.5242         |
| 7   | Cauldron/figureqa              | 100000 | 0.2622         |
| 8   | Cauldron/finqa                 | 5276   | 0.0138         |
| 9   | Cauldron/geomverse             | 9303   | 0.0244         |
| 10  | Cauldron/hateful-memes         | 8500   | 0.0223         |
| 11  | Cauldron/hitab                 | 2500   | 0.0066         |
| 12  | Cauldron/iam                   | 5663   | 0.0148         |
| 13  | Cauldron/iconqa                | 27307  | 0.0716         |
| 14  | Cauldron/infographic-vqa       | 2118   | 0.0056         |
| 15  | Cauldron/intergps              | 1280   | 0.0034         |
| 16  | Cauldron/localized-narratives  | 199998 | 0.5244         |
| 17  | Cauldron/mapqa                 | 37417  | 0.0981         |
| 18  | Cauldron/mimic-cgd             | 70939  | 0.1860         |
| 19  | Cauldron/multihiertr           | 7619   | 0.0200         |
| 20  | Cauldron/nlvr2                 | 50426  | 0.1322         |
| 21  | Cauldron/plotqa                | 157007 | 0.4117         |
| 22  | Cauldron/raven                 | 42000  | 0.1091         |
| 23  | Cauldron/rendered-text         | 10000  | 0.0262         |
| 24  | Cauldron/robut-sqa             | 8514   | 0.0223         |
| 25  | Cauldron/robut-wikisql         | 74989  | 0.1966         |
| 26  | Cauldron/robut-wtq             | 38246  | 0.1003         |
| 27  | Cauldron/scienceqa             | 4976   | 0.0130         |
| 28  | Cauldron/screen2words          | 15730  | 0.0412         |
| 29  | Cauldron/spot-the-diff         | 8566   | 0.0225         |
| 30  | Cauldron/tabmwp                | 22722  | 0.0596         |
| 31  | Cauldron/tallyqa               | 98680  | 0.2587         |
| 32  | Cauldron/tat-qa                | 2199   | 0.0058         |
| 33  | Cauldron/textcaps              | 21953  | 0.0576         |
| 34  | Cauldron/textvqa               | 21953  | 0.0576         |
| 35  | Cauldron/tqa                   | 1493   | 0.0039         |
| 36  | Cauldron/vistext               | 9969   | 0.0261         |
| 37  | Cauldron/visual7w              | 14366  | 0.0377         |
| 38  | Cauldron/visualmrc             | 3027   | 0.0079         |
| 39  | Cauldron/vqarad                | 313    | 0.0008         |
| 40  | Cauldron/vsr                   | 2157   | 0.0056         |
| 41  | Cauldron/websight              | 10000  | 0.0262         |
| 42  | ChartQA/augmented              | 15474  | 0.0406         |
| 43  | ChartQA/cap                    | 18207  | 0.0477         |
| 44  | ChartQA/cot                    | 18215  | 0.0478         |
| 45  | ChartQA/gemini-v               | 16393  | 0.0430         |
| 46  | ChartQA/gemini-v-cot           | 16393  | 0.0430         |
| 47  | ChartQA/human                  | 3699   | 0.0097         |
| 48  | ChartSFT/unichart              | 120554 | 0.3161         |
| 49  | CoSyn-400K/chart               | 116807 | 0.3063         |
| 50  | CoSyn-400K/chemical            | 8935   | 0.0234         |
| 51  | CoSyn-400K/circuit             | 10463  | 0.0274         |
| 52  | CoSyn-400K/diagram             | 34956  | 0.0916         |
| 53  | CoSyn-400K/document            | 71275  | 0.1869         |
| 54  | CoSyn-400K/graphic             | 26961  | 0.0707         |
| 55  | CoSyn-400K/math                | 66707  | 0.1749         |

Data Statistics and Proportion of Visual Instruction (Continue)

| No. | Data Set                                 | Number | Percentage (%) |
|-----|------------------------------------------|--------|----------------|
| 56  | CoSyn-400K/music                         | 11962  | 0.0314         |
| 57  | CoSyn-400K/nutrition                     | 6924   | 0.0181         |
| 58  | CoSyn-400K/table                         | 46511  | 0.1220         |
| 59  | CoSyn-point                              | 19385  | 0.0508         |
| 60  | DocVQA/cap                               | 9892   | 0.0259         |
| 61  | DocVQA/cot                               | 11938  | 0.0313         |
| 62  | DocVQA/gemini-v                          | 11182  | 0.0293         |
| 63  | DocVQA/gemini-v-cot                      | 11182  | 0.0293         |
| 64  | DocVQA/human                             | 10194  | 0.0267         |
| 65  | InfoVQA/cap                              | 4290   | 0.0112         |
| 66  | InfoVQA/cot                              | 6060   | 0.0159         |
| 67  | InfoVQA/gemini-v                         | 5187   | 0.0136         |
| 68  | InfoVQA/gemini-v-cot                     | 5187   | 0.0136         |
| 69  | InfoVQA/human                            | 4406   | 0.0116         |
| 70  | M4-Instruct/3D-LLM-3-datasets            | 49890  | 0.1308         |
| 71  | M4-Instruct/AESOP                        | 6915   | 0.0181         |
| 72  | M4-Instruct/ALFRED                       | 22565  | 0.0592         |
| 73  | M4-Instruct/Birds-to-Words               | 14281  | 0.0374         |
| 74  | M4-Instruct/CLEVR-Change                 | 3885   | 0.0102         |
| 75  | M4-Instruct/FlintstonesSV                | 22341  | 0.0586         |
| 76  | M4-Instruct/HQ-Edit                      | 50000  | 0.1311         |
| 77  | M4-Instruct/HQ-Edit-Diff                 | 7000   | 0.0184         |
| 78  | M4-Instruct/IEEdit                       | 3456   | 0.0091         |
| 79  | M4-Instruct/MIT-States-PropertyCoherence | 1900   | 0.0050         |
| 80  | M4-Instruct/MIT-States-StateCoherence    | 1900   | 0.0050         |
| 81  | M4-Instruct/MagicBrush                   | 14249  | 0.0374         |
| 82  | M4-Instruct/MagicBrush-Diff              | 6698   | 0.0176         |
| 83  | M4-Instruct/PororoSV                     | 12299  | 0.0322         |
| 84  | M4-Instruct/RAVEN                        | 35000  | 0.0918         |
| 85  | M4-Instruct/RecipeQA-ImageCoherence      | 8699   | 0.0228         |
| 86  | M4-Instruct/ScanQA                       | 25563  | 0.0670         |
| 87  | M4-Instruct/TQA                          | 8249   | 0.0216         |
| 88  | M4-Instruct/VISION                       | 9900   | 0.0260         |
| 89  | M4-Instruct/VIST                         | 26026  | 0.0682         |
| 90  | M4-Instruct/WebQA                        | 9338   | 0.0245         |
| 91  | M4-Instruct/coinstruct                   | 50000  | 0.1311         |
| 92  | M4-Instruct/contrastive-caption          | 25240  | 0.0662         |
| 93  | M4-Instruct/dreamsim                     | 15941  | 0.0418         |
| 94  | M4-Instruct/iconqa                       | 34603  | 0.0907         |
| 95  | M4-Instruct/imagecode                    | 16594  | 0.0435         |
| 96  | M4-Instruct/multi-vqa                    | 4993   | 0.0131         |
| 97  | M4-Instruct/nextqa                       | 3870   | 0.0102         |
| 98  | M4-Instruct/nlvr2                        | 86373  | 0.2265         |
| 99  | M4-Instruct/star                         | 3032   | 0.0079         |
| 100 | M4-Instruct/twitter-post                 | 5734   | 0.0150         |
| 101 | Markdown/arxiv-v2                        | 200000 | 0.5244         |
| 102 | Markdown/docx-en                         | 200000 | 0.5244         |
| 103 | Markdown/docx-zh                         | 200000 | 0.5244         |
| 104 | Markdown/pubtables-c                     | 200000 | 0.5244         |
| 105 | Markdown/pubtables-e                     | 200000 | 0.5244         |
| 106 | Markdown/pubtables-o                     | 200000 | 0.5244         |
| 107 | Markdown/readme-v2                       | 200000 | 0.5244         |
| 108 | Math-PUMA/Synthesis-train-answer         | 120239 | 0.3153         |
| 109 | Math-PUMA/Synthesis-train-instruction    | 120239 | 0.3153         |
| 110 | Math-PUMA/VarsityTutors-pure-text        | 232959 | 0.6108         |



Data Statistics and Proportion of Visual Instruction (Continue)

| No. | Data Set                                 | Number  | Percentage (%) |
|-----|------------------------------------------|---------|----------------|
| 111 | Math-PUMA/VarsityTutors-with-image       | 78935   | 0.2070         |
| 112 | Math-PUMA/VisualWebInstruct-train-answer | 263599  | 0.6911         |
| 113 | OCR/iit-cdip-v2-en                       | 200000  | 0.5244         |
| 114 | OCR/laion-text-en                        | 50000   | 0.1311         |
| 115 | OCR/laion-text-v2-en                     | 200000  | 0.5244         |
| 116 | OCR/pdf-en                               | 200000  | 0.5244         |
| 117 | OCR/pdf-zh                               | 200000  | 0.5244         |
| 118 | OCR/wukong-text-v2-zh                    | 200000  | 0.5244         |
| 119 | OCR/wukong-text-zh                       | 50000   | 0.1311         |
| 120 | OneVision/ai2d-gpt4v                     | 4833    | 0.0127         |
| 121 | OneVision/ai2d-internvl                  | 12372   | 0.0324         |
| 122 | OneVision/clevr-math-mathv360k           | 5249    | 0.0138         |
| 123 | OneVision/figureqa-mathv360k             | 17556   | 0.0460         |
| 124 | OneVision/geo3k                          | 2060    | 0.0054         |
| 125 | OneVision/geometry3k-mathv360k           | 9693    | 0.0254         |
| 126 | OneVision/geoqa-plus-mathv360k           | 17131   | 0.0449         |
| 127 | OneVision/geos-mathv360k                 | 467     | 0.0012         |
| 128 | OneVision/iconqa-mathv360k               | 22558   | 0.0591         |
| 129 | OneVision/iiit5k                         | 1959    | 0.0051         |
| 130 | OneVision/image-textualization-filtered  | 99542   | 0.2610         |
| 131 | OneVision/infographic-gpt4v              | 1951    | 0.0051         |
| 132 | OneVision/k12-printing                   | 256605  | 0.6728         |
| 133 | OneVision/lrv-chart                      | 1745    | 0.0046         |
| 134 | OneVision/lrv-normal-filtered            | 10456   | 0.0274         |
| 135 | OneVision/mapqa-mathv360k                | 5194    | 0.0136         |
| 136 | OneVision/orand-car-a                    | 1968    | 0.0052         |
| 137 | OneVision/pmc-vqa-mathv360k              | 35917   | 0.0942         |
| 138 | OneVision/scienceqa-nona-context         | 19177   | 0.0503         |
| 139 | OneVision/super-clevr-mathv360k          | 8611    | 0.0226         |
| 140 | OneVision/tabmwp-mathv360k               | 22421   | 0.0588         |
| 141 | OneVision/unigeo-mathv360k               | 11918   | 0.0312         |
| 142 | OneVision/vision-flan-filtered           | 186029  | 0.4877         |
| 143 | OneVision/vizwiz-mathv360k               | 6573    | 0.0172         |
| 144 | PixMo/ask-model-anything                 | 161737  | 0.4241         |
| 145 | PixMo/ask-model-anything-zh              | 140343  | 0.3679         |
| 146 | PixMo/cap                                | 717042  | 1.8800         |
| 147 | PixMo/cap-qa                             | 271714  | 0.7124         |
| 148 | PixMo/cap-qa-zh                          | 194097  | 0.5090         |
| 149 | PixMo/cap-zh                             | 508134  | 1.3323         |
| 150 | PixMo/count                              | 36916   | 0.0968         |
| 151 | PixMo/docs-charts                        | 116814  | 0.3063         |
| 152 | PixMo/docs-diagrams                      | 16551   | 0.0434         |
| 153 | PixMo/docs-other                         | 71282   | 0.1869         |
| 154 | PixMo/docs-tables                        | 46518   | 0.1220         |
| 155 | PixMo/point-explanations                 | 79551   | 0.2086         |
| 156 | PixMo/points                             | 2376222 | 6.2301         |
| 157 | QwenCaps/PixMo/cap                       | 712401  | 1.8680         |
| 158 | QwenCaps/PixMo/cap-zh                    | 642166  | 1.6837         |
| 159 | QwenCaps/ai2d                            | 9778    | 0.0256         |
| 160 | QwenCaps/allava-laion                    | 480858  | 1.2608         |
| 161 | QwenCaps/chart2text                      | 16605   | 0.0435         |
| 162 | QwenCaps/chart-to-text                   | 44096   | 0.1156         |
| 163 | QwenCaps/chartqa                         | 18317   | 0.0480         |
| 164 | QwenCaps/coco                            | 163119  | 0.4277         |
| 165 | QwenCaps/docvqa                          | 11166   | 0.0293         |

Data Statistics and Proportion of Visual Instruction (Continue)

| No. | Data Set                              | Number | Percentage (%) |
|-----|---------------------------------------|--------|----------------|
| 166 | QwenCaps/flickr30k                    | 31772  | 0.0833         |
| 167 | QwenCaps/funsd                        | 149    | 0.0004         |
| 168 | QwenCaps/infvqa                       | 4890   | 0.0128         |
| 169 | QwenCaps/laion-gpt4v                  | 10962  | 0.0287         |
| 170 | QwenCaps/llava                        | 557086 | 1.4606         |
| 171 | QwenCaps/llavar-s1                    | 47231  | 0.1238         |
| 172 | QwenCaps/ocr-vqa                      | 208190 | 0.5458         |
| 173 | QwenCaps/opencqa                      | 7724   | 0.0202         |
| 174 | QwenCaps/poie                         | 2999   | 0.0079         |
| 175 | QwenCaps/sam                          | 33533  | 0.0879         |
| 176 | QwenCaps/scienceqa                    | 4985   | 0.0131         |
| 177 | QwenCaps/screen2words                 | 15669  | 0.0411         |
| 178 | QwenCaps/sroie                        | 608    | 0.0016         |
| 179 | QwenCaps/textvqa                      | 24990  | 0.0655         |
| 180 | QwenCaps/vg                           | 105345 | 0.2762         |
| 181 | QwenCaps/vision-flan                  | 181189 | 0.4751         |
| 182 | QwenCaps/vistext                      | 8816   | 0.0231         |
| 183 | QwenCaps/xfund                        | 1043   | 0.0027         |
| 184 | QwenQA/Cauldron/cocoqa                | 27022  | 0.0708         |
| 185 | QwenQA/Cauldron/diagram-image-to-text | 297    | 0.0008         |
| 186 | QwenQA/Cauldron/hateful-memes         | 3729   | 0.0098         |
| 187 | QwenQA/Cauldron/mapqa                 | 22950  | 0.0602         |
| 188 | QwenQA/Cauldron/tabmwp                | 22410  | 0.0588         |
| 189 | QwenQA/Cauldron/tallyqa               | 83671  | 0.2194         |
| 190 | QwenQA/Cauldron/textvqa               | 16059  | 0.0421         |
| 191 | QwenQA/Cauldron/tqa                   | 861    | 0.0023         |
| 192 | QwenQA/Cauldron/visual7w              | 13006  | 0.0341         |
| 193 | QwenQA/Cauldron/vsr                   | 1650   | 0.0043         |
| 194 | QwenQA/ChartQA/augmented              | 12469  | 0.0327         |
| 195 | QwenQA/ChartQA/human                  | 3290   | 0.0086         |
| 196 | QwenQA/DocVQA/human                   | 8924   | 0.0234         |
| 197 | QwenQA/InfoVQA/human                  | 4092   | 0.0107         |
| 198 | QwenQA/PixMo/cap-qa                   | 247256 | 0.6483         |
| 199 | QwenQA/PixMo/cap-qa-zh                | 218868 | 0.5738         |
| 200 | QwenQA/ai2d                           | 10593  | 0.0278         |
| 201 | QwenQA/allava-laion                   | 484257 | 1.2697         |
| 202 | QwenQA/allava-vflan                   | 179020 | 0.4694         |
| 203 | QwenQA/aokvqa                         | 39358  | 0.1032         |
| 204 | QwenQA/gqa                            | 69198  | 0.1814         |
| 205 | QwenQA/okvqa                          | 3442   | 0.0090         |
| 206 | QwenQA/raw/ChartQA/augmented          | 15474  | 0.0406         |
| 207 | QwenQA/raw/ChartQA/human              | 3699   | 0.0097         |
| 208 | QwenQA/raw/DocVQA/human               | 10194  | 0.0267         |
| 209 | QwenQA/raw/InfoVQA/human              | 4394   | 0.0115         |
| 210 | QwenQA/raw/ai2d                       | 12413  | 0.0325         |
| 211 | QwenQA/raw/aokvqa                     | 76762  | 0.2013         |
| 212 | QwenQA/raw/gqa                        | 72140  | 0.1891         |
| 213 | QwenQA/raw/okvqa                      | 8996   | 0.0236         |
| 214 | QwenQA/raw/scienceqa                  | 12726  | 0.0334         |
| 215 | QwenQA/raw/stvqa                      | 18921  | 0.0496         |
| 216 | QwenQA/raw/tabfact                    | 13127  | 0.0344         |
| 217 | QwenQA/raw/vqav2                      | 82783  | 0.2171         |
| 218 | QwenQA/raw/wtq                        | 1679   | 0.0044         |
| 219 | QwenQA/scienceqa                      | 11071  | 0.0290         |
| 220 | QwenQA/stvqa                          | 14381  | 0.0377         |

Data Statistics and Proportion of Visual Instruction (Continue)

| No. | Data Set                  | Number  | Percentage (%) |
|-----|---------------------------|---------|----------------|
| 221 | QwenQA/tabfact            | 12648   | 0.0332         |
| 222 | QwenQA/vqav2              | 78718   | 0.2064         |
| 223 | QwenQA/wtq                | 1588    | 0.0042         |
| 224 | R1-Vision/PixMo/cap-qa    | 260144  | 0.6821         |
| 225 | R1-Vision/PixMo/cap-qa-zh | 218962  | 0.5741         |
| 226 | Screen/grd                | 212472  | 0.5571         |
| 227 | Screen/grd-small          | 212472  | 0.5571         |
| 228 | Screen/nav                | 286364  | 0.7508         |
| 229 | Screen/nav-small          | 286364  | 0.7508         |
| 230 | Screen/ref                | 402742  | 1.0560         |
| 231 | Screen/ref-small          | 402742  | 1.0560         |
| 232 | Screen/sqa                | 417579  | 1.0948         |
| 233 | Screen/sqa-small          | 417579  | 1.0948         |
| 234 | Screen/ui-en              | 50000   | 0.1311         |
| 235 | Screen/ui-en-small        | 50000   | 0.1311         |
| 236 | Screen/ui-zh              | 50000   | 0.1311         |
| 237 | Screen/ui-zh-small        | 50000   | 0.1311         |
| 238 | XFUND/zh                  | 149     | 0.0004         |
| 239 | XFUND/zh-qa               | 671     | 0.0018         |
| 240 | Allava-caption-laion      | 505588  | 1.3256         |
| 241 | Allava-caption-vflan      | 182864  | 0.4794         |
| 242 | Allava-instruct-laion     | 505588  | 1.3256         |
| 243 | Allava-instruct-vflan     | 183839  | 0.4820         |
| 244 | Aokvqa                    | 76762   | 0.2013         |
| 245 | Chartsft                  | 808768  | 2.1205         |
| 246 | Cipc-docvqa               | 5243    | 0.0137         |
| 247 | Coavqa-bench              | 36019   | 0.0944         |
| 248 | Coavqa-chat               | 18004   | 0.0472         |
| 249 | Coco-rec                  | 130723  | 0.3427         |
| 250 | Coco-reg                  | 130723  | 0.3427         |
| 251 | Crohme                    | 9821    | 0.0257         |
| 252 | Datikz-v2                 | 94532   | 0.2479         |
| 253 | Dcc                       | 97306   | 0.2551         |
| 254 | Docmatix                  | 1249967 | 3.2773         |
| 255 | E2e-ocr                   | 259511  | 0.6804         |
| 256 | E2e-ocr-0324              | 359996  | 0.9440         |
| 257 | Eikie-qa                  | 183639  | 0.4815         |
| 258 | Estvqa                    | 17047   | 0.0447         |
| 259 | Estvqa-ca                 | 17047   | 0.0447         |
| 260 | Estvqa-grounding          | 17047   | 0.0447         |
| 261 | Flickr                    | 148915  | 0.3904         |
| 262 | Funsd                     | 149     | 0.0004         |
| 263 | Funsd-qa                  | 431     | 0.0011         |
| 264 | Geo170k-alignment         | 60252   | 0.1580         |
| 265 | Geo170k-qa-tuning         | 117205  | 0.3073         |
| 266 | Geo-synth-caption-1108    | 320000  | 0.8390         |
| 267 | Geo-synth-qa-1108         | 320004  | 0.8390         |
| 268 | Gqa                       | 72140   | 0.1891         |
| 269 | Hme                       | 74502   | 0.1953         |
| 270 | Kvqa                      | 24602   | 0.0645         |
| 271 | Laion-gpt4v               | 12356   | 0.0324         |
| 272 | Llava-s2                  | 157712  | 0.4135         |
| 273 | Llarar-s2                 | 19800   | 0.0519         |
| 274 | Lrv-instruction           | 180722  | 0.4738         |
| 275 | Lvis-instruct4v           | 222711  | 0.5840         |

Data Statistics and Proportion of Visual Instruction (Continue)

| No.          | Data Set                  | Number          | Percentage (%)  |
|--------------|---------------------------|-----------------|-----------------|
| 276          | M2e                       | 99956           | 0.2621          |
| 277          | Mavis-900k                | 458042          | 1.2009          |
| 278          | Mavis-caps                | 599748          | 1.5725          |
| 279          | Mlhme                     | 30000           | 0.0786          |
| 280          | Mmc-non-arxiv-2           | 21103           | 0.0553          |
| 281          | Mmc-non-arxiv-3           | 88917           | 0.2331          |
| 282          | Noahcaps-en               | 14956           | 0.0392          |
| 283          | Noahcaps-zh               | 44394           | 0.1164          |
| 284          | Objects365                | 1737995         | 4.5568          |
| 285          | Ocrvqa                    | 207572          | 0.5442          |
| 286          | Okvqa                     | 8996            | 0.0236          |
| 287          | Petal-wiki                | 2396596         | 6.2836          |
| 288          | Poie                      | 2250            | 0.0059          |
| 289          | Pointqa-general           | 82254           | 0.2157          |
| 290          | Pointqa-local             | 10403           | 0.0273          |
| 291          | Pointqa-looktwice         | 22838           | 0.0599          |
| 292          | Sharegpt4o-image          | 57289           | 0.1502          |
| 293          | Sharegpt4o-video          | 2111            | 0.0055          |
| 294          | Sharegpt4v                | 102025          | 0.2675          |
| 295          | Shikra                    | 5814            | 0.0152          |
| 296          | Slidecaps                 | 34810           | 0.0913          |
| 297          | Slidevqa                  | 10341           | 0.0271          |
| 298          | Sroie                     | 500             | 0.0013          |
| 299          | Stvqa                     | 18921           | 0.0496          |
| 300          | Svit                      | 136349          | 0.3575          |
| 301          | Tabfact                   | 13182           | 0.0346          |
| 302          | Tech4all                  | 8256            | 0.0216          |
| 303          | Textocr-gpt4v             | 25114           | 0.0658          |
| 304          | Tiku/math-4o-zh           | 386025          | 1.0121          |
| 305          | Tiku/multidisciplinary-en | 2220078         | 5.8207          |
| 306          | Unimer                    | 987289          | 2.5885          |
| 307          | VCR                       | 95036           | 0.2492          |
| 308          | Vflan-4o-zh               | 35899           | 0.0941          |
| 309          | VG-rem                    | 611465          | 1.6032          |
| 310          | Viquae                    | 1190            | 0.0031          |
| 311          | VQA-cdip-anneal           | 753921          | 1.9767          |
| 312          | VQAv2                     | 82783           | 0.2171          |
| 313          | WTQ                       | 1679            | 0.0044          |
| <b>Total</b> |                           | <b>38140772</b> | <b>100.0000</b> |

### B.3 SUPERVISED FINE-TUNING DATA

During the initial phase of SFT data construction, our objective is to equip the model to handle a broad spectrum of application scenarios. To this end, we develop a model capability taxonomy based on the classification of traditional visual tasks and practical application requirements of vision-language models. Guided by this taxonomy, we sample from open-source multi-task training data to supplement high-quality instruction data. We use a pretrained model to classify the open-source data and extract the required categories. For data where image and question quality are high but answer quality is poor, we re-annotate the answers using a model and perform manual verification. Additionally, based on category guidelines, we generate targeted instruction data for certain categories to further enhance the model’s capabilities. Furthermore, we utilized language data produced by DeepSeek R1 to preserve the MLLM’s linguistic abilities, with the ratio of multimodal to language data being approximately 1:1 at this stage.

Table 15: Detailed Statistics of SFT Data

| No. | Dataset Name                    | Number  | Percentage (%) |
|-----|---------------------------------|---------|----------------|
| 1   | Competition Mathematics         | 150000  | 2.4269         |
| 2   | Code                            | 50000   | 0.8089         |
| 3   | Math                            | 200000  | 3.2359         |
| 4   | General QA                      | 300000  | 4.8539         |
| 5   | Tulu Instruction                | 19118   | 0.3093         |
| 6   | Multi-turn Conversation         | 61114   | 0.9888         |
| 7   | MegaScience                     | 1250000 | 20.2244        |
| 8   | OpenHermes2-5                   | 200000  | 3.2359         |
| 9   | QwenCaps/PixMo/cap              | 712401  | 11.5263        |
| 10  | QwenCaps/PixMo/cap-zh           | 10000   | 0.1618         |
| 11  | QwenCaps/Allava-Laion           | 10000   | 0.1618         |
| 12  | QwenCaps/COCO                   | 10000   | 0.1618         |
| 13  | QwenCaps/Flickr30k              | 10000   | 0.1618         |
| 14  | QwenCaps/Laion-GPT4V            | 10000   | 0.1618         |
| 15  | QwenCaps/LLaVA                  | 10000   | 0.1618         |
| 16  | QwenCaps/LLaVaR-S1              | 10000   | 0.1618         |
| 17  | QwenCaps/OCR-VQA                | 10000   | 0.1618         |
| 18  | QwenCaps/SAM                    | 10000   | 0.1618         |
| 19  | QwenCaps/VG                     | 10000   | 0.1618         |
| 20  | QwenCaps/Vision-FLAN            | 10000   | 0.1618         |
| 21  | DCC                             | 10000   | 0.1618         |
| 22  | NoahCaps-EN                     | 10000   | 0.1618         |
| 23  | NoahCaps-ZH                     | 10000   | 0.1618         |
| 24  | ShareGPT4O-Image                | 10000   | 0.1618         |
| 25  | ShareGPT4O-Video                | 10000   | 0.1618         |
| 26  | Tech4All                        | 10000   | 0.1618         |
| 27  | OneVision/CLEVR-Math-MathV360K  | 10000   | 0.1618         |
| 28  | OneVision/Super-CLEVR-MathV360K | 10000   | 0.1618         |
| 29  | PixMo/Ask-Model-Anything        | 161737  | 2.6168         |
| 30  | PixMo/Ask-Model-Anything-ZH     | 10000   | 0.1618         |
| 31  | PixMo/Count                     | 10000   | 0.1618         |
| 32  | QwenQA/Cauldron/COCOQA          | 27022   | 0.4372         |
| 33  | QwenQA/Cauldron/TallyQA         | 83671   | 1.3538         |
| 34  | QwenQA/Cauldron/Visual7W        | 13006   | 0.2104         |
| 35  | QwenQA/Cauldron/VSR             | 1650    | 0.0267         |
| 36  | QwenQA/PixMo/Cap-QA             | 247256  | 3.9990         |
| 37  | QwenQA/PixMo/Cap-QA-ZH          | 10000   | 0.1618         |
| 38  | QwenQA/Allava-Laion             | 484257  | 7.8350         |
| 39  | QwenQA/Allava-VFLAN             | 179020  | 2.8965         |
| 40  | QwenQA/AOKVQA                   | 39358   | 0.6368         |
| 41  | QwenQA/GQA                      | 69198   | 1.1196         |
| 42  | QwenQA/OKVQA                    | 3442    | 0.0557         |
| 43  | QwenQA/VQAv2                    | 78718   | 1.2736         |
| 44  | QwenQA/Raw/AOKVQA               | 10000   | 0.1618         |
| 45  | QwenQA/Raw/GQA                  | 10000   | 0.1618         |
| 46  | QwenQA/Raw/OKVQA                | 10000   | 0.1618         |
| 47  | QwenQA/Raw/VQAv2                | 10000   | 0.1618         |
| 48  | VFLAN-4O-ZH                     | 10000   | 0.1618         |
| 49  | Cauldron/IconQA                 | 10000   | 0.1618         |
| 50  | Cauldron/Mimic-CGD              | 10000   | 0.1618         |
| 51  | Cauldron/NLVR2                  | 10000   | 0.1618         |
| 52  | Cauldron/Raven                  | 10000   | 0.1618         |
| 53  | Cauldron/Spot-the-Diff          | 10000   | 0.1618         |
| 54  | PixMo/Points                    | 10000   | 0.1618         |
| 55  | COCO-Rec                        | 130723  | 2.1150         |

Detailed Statistics of SFT Data (Continued).

| No. | Dataset Name                          | Number | Percentage (%) |
|-----|---------------------------------------|--------|----------------|
| 56  | COCO-Reg                              | 130723 | 2.1150         |
| 57  | Flickr                                | 10000  | 0.1618         |
| 58  | Objects365                            | 10000  | 0.1618         |
| 59  | Cauldron/IAM                          | 10000  | 0.1618         |
| 60  | CoSyn-400K/Chart                      | 10000  | 0.1618         |
| 61  | CoSyn-400K/Chemical                   | 10000  | 0.1618         |
| 62  | CoSyn-400K/Circuit                    | 10000  | 0.1618         |
| 63  | CoSyn-400K/Diagram                    | 10000  | 0.1618         |
| 64  | CoSyn-400K/Document                   | 10000  | 0.1618         |
| 65  | CoSyn-400K/Graphic                    | 10000  | 0.1618         |
| 66  | CoSyn-400K/Music                      | 10000  | 0.1618         |
| 67  | CoSyn-400K/Nutrition                  | 10000  | 0.1618         |
| 68  | CoSyn-400K/Table                      | 10000  | 0.1618         |
| 69  | OneVision/IIIT5K                      | 10000  | 0.1618         |
| 70  | OneVision/K12-Printing                | 10000  | 0.1618         |
| 71  | OneVision/LRV-Chart                   | 10000  | 0.1618         |
| 72  | OneVision/Orand-Car-A                 | 10000  | 0.1618         |
| 73  | QwenCaps/ChartQA                      | 18317  | 0.2964         |
| 74  | QwenCaps/Chart2Text                   | 16605  | 0.2687         |
| 75  | QwenCaps/Chart-to-Text                | 44096  | 0.7135         |
| 76  | QwenCaps/DocVQA                       | 11166  | 0.1807         |
| 77  | QwenCaps/FUNSD                        | 149    | 0.0024         |
| 78  | QwenCaps/InfoVQA                      | 4890   | 0.0791         |
| 79  | QwenCaps/OpenCQA                      | 7724   | 0.1250         |
| 80  | QwenCaps/POIE                         | 2999   | 0.0485         |
| 81  | QwenCaps/SROIE                        | 608    | 0.0098         |
| 82  | QwenCaps/TextVQA                      | 24990  | 0.4043         |
| 83  | QwenCaps/Vistext                      | 8816   | 0.1426         |
| 84  | QwenCaps/XFUND                        | 1043   | 0.0169         |
| 85  | QwenQA/Cauldron/Diagram-Image-to-Text | 297    | 0.0048         |
| 86  | QwenQA/Cauldron/Hateful-Memes         | 3729   | 0.0603         |
| 87  | QwenQA/Cauldron/TabMWP                | 22410  | 0.3626         |
| 88  | QwenQA/Cauldron/TextVQA               | 16059  | 0.2598         |
| 89  | QwenQA/ChartQA/Human                  | 3290   | 0.0532         |
| 90  | QwenQA/ChartQA/Augmented              | 12469  | 0.2017         |
| 91  | QwenQA/DocVQA/Human                   | 8924   | 0.1444         |
| 92  | QwenQA/InfoVQA/Human                  | 4092   | 0.0662         |
| 93  | QwenQA/STVQA                          | 14381  | 0.2327         |
| 94  | QwenQA/TabFact                        | 12648  | 0.2046         |
| 95  | QwenQA/WTQ                            | 1588   | 0.0257         |
| 96  | QwenQA/Raw/STVQA                      | 10000  | 0.1618         |
| 97  | QwenQA/Raw/TabFact                    | 10000  | 0.1618         |
| 98  | QwenQA/Raw/WTQ                        | 10000  | 0.1618         |
| 99  | XFUND/ZH-QA                           | 10000  | 0.1618         |
| 100 | CIPC-DocVQA                           | 10000  | 0.1618         |
| 101 | CoAVQA-Chat                           | 10000  | 0.1618         |
| 102 | CoAVQA-Bench                          | 10000  | 0.1618         |
| 103 | E2E-OCR-0324                          | 359996 | 5.8245         |
| 104 | ESTVQA                                | 10000  | 0.1618         |
| 105 | ESTVQA-Grounding                      | 10000  | 0.1618         |
| 106 | FUNSD-QA                              | 10000  | 0.1618         |
| 107 | POIE                                  | 10000  | 0.1618         |
| 108 | SlideCaps                             | 10000  | 0.1618         |
| 109 | SlideVQA                              | 10000  | 0.1618         |
| 110 | SROIE                                 | 10000  | 0.1618         |

Detailed Statistics of SFT Data (Continued).

| No.   | Dataset Name                   | Number         | Percentage (%)  |
|-------|--------------------------------|----------------|-----------------|
| 111   | VQA-CDIP-SFT                   | 10000          | 0.1618          |
| 112   | QwenCaps/Screen2Words          | 10000          | 0.1618          |
| 113   | Cauldron/VisualMRC             | 10000          | 0.1618          |
| 114   | Cauldron/WebSight              | 10000          | 0.1618          |
| 115   | CoSyn-Point                    | 10000          | 0.1618          |
| 116   | Screen/Nav                     | 10000          | 0.1618          |
| 117   | Screen/Ref                     | 10000          | 0.1618          |
| 118   | Screen/SQA                     | 10000          | 0.1618          |
| 119   | Cauldron/GeomVerse             | 10000          | 0.1618          |
| 120   | CoSyn-400K/Math                | 66707          | 1.0793          |
| 121   | OneVision/Geometry3K-MathV360K | 10000          | 0.1618          |
| 122   | OneVision/GeoQA-Plus-MathV360K | 10000          | 0.1618          |
| 123   | OneVision/Geos-MathV360K       | 10000          | 0.1618          |
| 124   | OneVision/IconQA-MathV360K     | 10000          | 0.1618          |
| 125   | OneVision/PMC-VQA-MathV360K    | 10000          | 0.1618          |
| 126   | OneVision/TabMWP-MathV360K     | 10000          | 0.1618          |
| 127   | OneVision/Unigeo-MathV360K     | 10000          | 0.1618          |
| 128   | OneVision/Geo3K                | 10000          | 0.1618          |
| 129   | OneVision/Mavis-Math-Metagen   | 10000          | 0.1618          |
| 130   | OneVision/Mavis-Math-Rule-Geo  | 10000          | 0.1618          |
| 131   | CROHME                         | 10000          | 0.1618          |
| 132   | Geo170K-Alignment              | 10000          | 0.1618          |
| 133   | Geo170K-QA-Tuning              | 10000          | 0.1618          |
| 134   | HME                            | 10000          | 0.1618          |
| 135   | M2E                            | 10000          | 0.1618          |
| 136   | MLHME                          | 10000          | 0.1618          |
| 137   | Unimer                         | 10000          | 0.1618          |
| 138   | QwenCaps/AI2D                  | 9778           | 0.1582          |
| 139   | QwenCaps/ScienceQA             | 4985           | 0.0807          |
| 140   | QwenQA/Cauldron/MapQA          | 22950          | 0.3713          |
| 141   | QwenQA/Cauldron/TQA            | 861            | 0.0139          |
| 142   | QwenQA/AI2D                    | 10593          | 0.1714          |
| 143   | QwenQA/ScienceQA               | 11071          | 0.1791          |
| Total |                                | <b>6180645</b> | <b>100.0000</b> |

## C EXPERIMENTS

### C.1 RESULTS OF TEST-TIME RESOLUTION SEARCH

In this Section, we present detail evaluation results with test-time image resolution search strategy. On MME dataset, as shown in Figure 8, models trained with different resolution lengths yield consistent evaluation results when min-pixels is less than 16. In addition, down-sampling images on MME results in a significant improvement in model performance. On OCRBench dataset, as shown in Figure 9, when min-pixels is set to 16 or 32, the model performs better than when it is set to 4. The reason is that too small input images are out of distribution in OCR task for our model. On the other hand, when min-pixels is set to 64, the model performance degrades. The reason is that the image blurring effect caused by up-sampling images has a negative impact on the model’s visual perception. On DocVQA and InfoVQA datasets, as shown in Figure 10 and Figure 11, min-pixels variable has no detectable impact on the evaluation results since most of the images in these two datasets have a resolution higher than min-pixels. Furthermore, the optimal inference max-pixels on these two datasets falls within the range of 2560–3072.

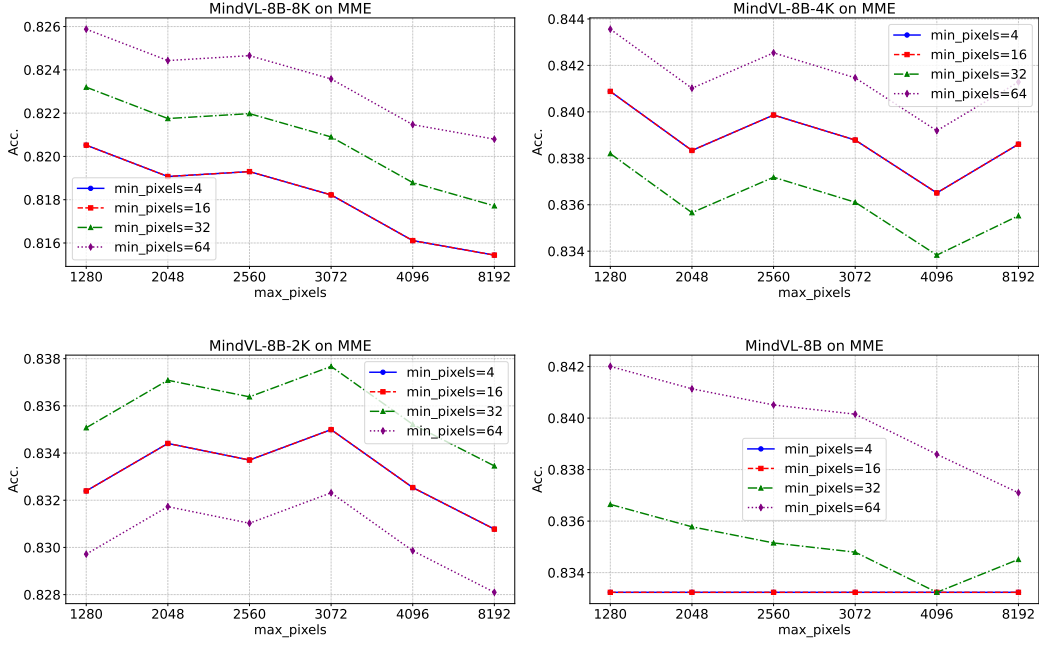

Figure 8: Evaluation results on MME of MindVL with different input image resolutions.

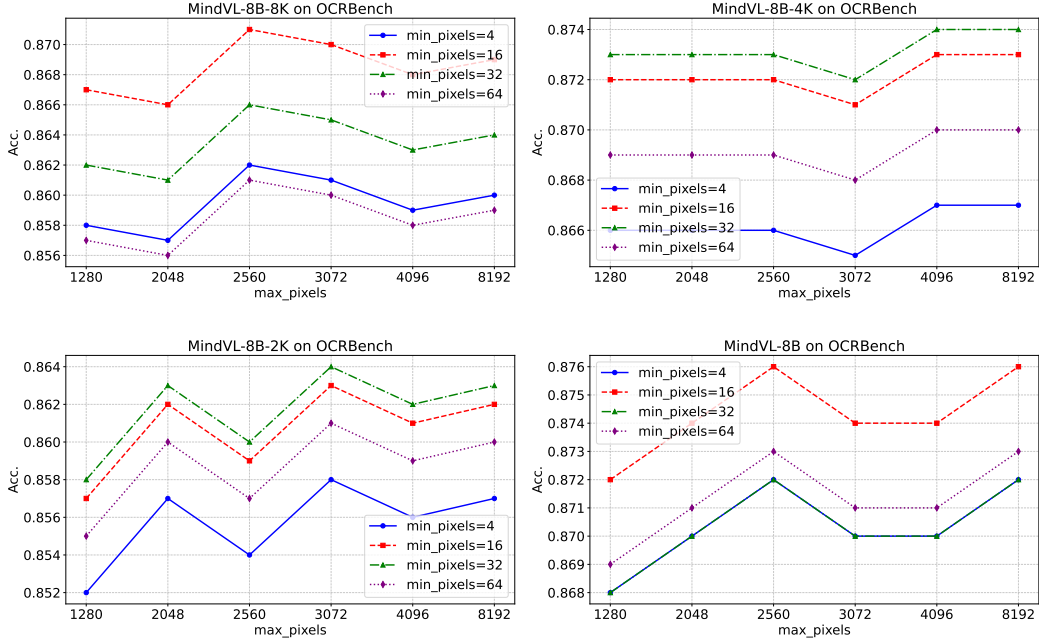

Figure 9: Evaluation results on OCRBench of MindVL with different input image resolutions.

## C.2 INTEGRATION OF MULTITASK DATA

We also present the experimental results of the model trained with different data recipes. As shown in Table 16, MindVL-8B-V1Data model is trained with introduced data of Video, Captions, OCR, GUI, Math, Knowledge, Grounding and Genreal VQA introduced in Section 4.2. For MindVL-8B-V2Data model, Internleaved image-text data are added for training. For MindVL-8B-V3Data model, STEM data and additional Captions, OCR, GUI, Grounding and Genreal VQA data are added



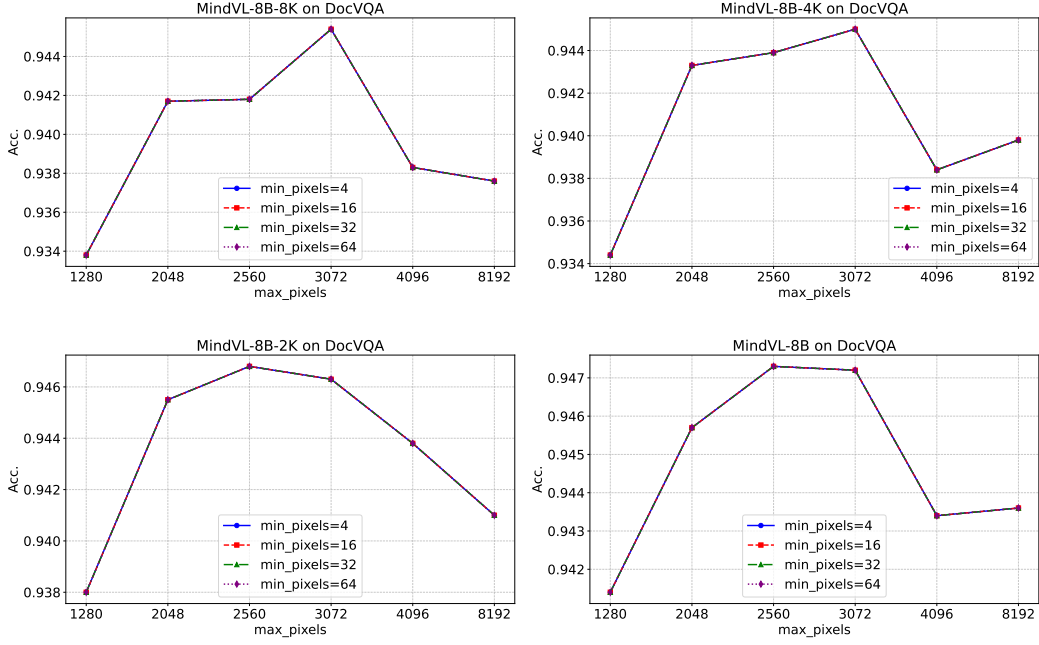

Figure 10: Evaluation results on DocVQA of MindVL with different input image resolutions.

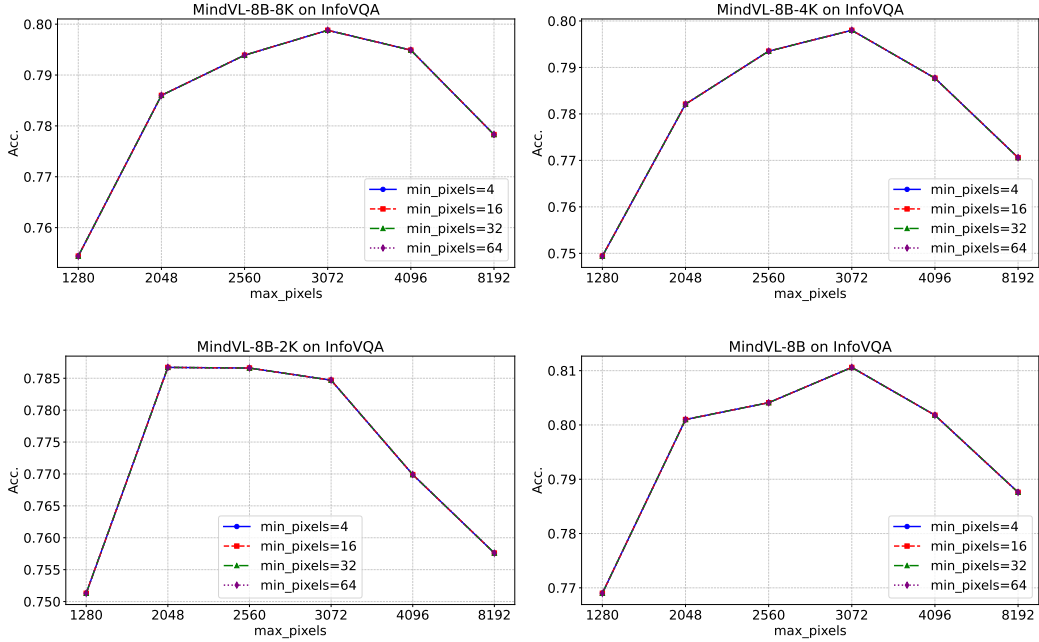

Figure 11: Evaluation results on InfoVQA of MindVL with different input image resolutions.

for training. By comparing the results of MindVL-8B-V1Data and MindVL-8B-V2Data, we can observe that adding Internleaved image-text data for training can significantly improve performance over all benchmarks. It is because that interleaved image-text data not only contains complex logical relationships between text and images, but also covers a wide range of domain knowledge—both of which are highly beneficial for enhancing the multimodal model’s cognitive capabilities. Moreover, by adding more refined and diverse Captions, OCR, GUI, Grounding and Genreal VQA data to train

the model MindVL-8B-V3Data, the performance on multiple benchmark datasets has been further improved, such as MME, MMBench and InfoVQA.

Table 16: Ablation study results of multitask data.

| Model            | MME  | MMBench | OCRBench | DocVQA | ChartQA | InfoVQA | Overall |
|------------------|------|---------|----------|--------|---------|---------|---------|
| MindVL-8B-V1Data | 79.8 | 81.5    | 83.3     | 92.1   | 83.7    | 73.2    | 82.3    |
| MindVL-8B-V2Data | 82.4 | 83.4    | 88.2     | 94.7   | 87.2    | 79.9    | 86.0    |
| MindVL-8B-V3Data | 84.1 | 84.3    | 87.6     | 94.7   | 87.2    | 81.1    | 86.5    |

### C.3 ABLATION STUDY ON TRAINING PHASES

Table 17: Ablation study results on training phases.

| Model             | MME  | MMBench | OCRBench | DocVQA | ChartQA | InfoVQA | Overall |
|-------------------|------|---------|----------|--------|---------|---------|---------|
| MindVL-8B-4Phase  | 80.8 | 82.3    | 83.6     | 92.7   | 86.4    | 76.9    | 83.8    |
| MindVL-8B-2Phase* | 79.4 | 81.8    | 84.9     | 93.5   | 85.2    | 75.8    | 83.4    |
| MindVL-8B-2Phase  | 81.6 | 82.4    | 87.0     | 94.2   | 86.8    | 79.6    | 85.3    |
| MindVL-8B-3Phase  | 84.1 | 84.3    | 87.6     | 94.7   | 87.2    | 81.1    | 86.5    |

As mentioned in Section 5.2, MindVL-8B undergoes a three-phase training pipeline: warm-up, multi-task learning, and SFT. We denote the model trained on such recipe as MindVL-8B-3Phase. Table 17 shows the results of ablation study on training phases. MindVL-8B-4Phase model is trained on a four-phase training pipeline: warm-up, pretrain, multi-task learning, and SFT. In the pretrain phase, both ViT and MLP adaptor are trained. Our ultimate training recipe has only three-phase: warm-up, multi-task learning and SFT, achieves best performance by merging training data in warm-up and pretrain phases of MindVL-8B-4Phase. By changing the four-phase training recipe to a three-phase training recipe, we have not only improved training efficiency but also enhanced the model performances. Such results indicate that training a MLP adaptor can also align ViT and LLMs effectively.

We also conducted experiments with two-phase training recipes, MindVL-8B-2Phase\* undergoes warm-up and SFT, and MindVL-8B-2Phase undergoes warm-up and multi-task learning with the training data in corresponding phase. The results show that MindVL-8B-2Phase outperformance MindVL-8B-2Phase\*, which indicate that high-quality multi-task data is crucial for enhancing the capabilities of multimodal models.

## D EXAMPLES

We list some samples whose answers are predicted by our MindVL-671B-37B.

Image:

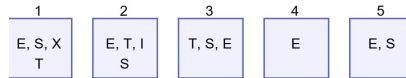

Question:

从每个盒子里取出卡片，这样最后每个盒子里只有一张卡片，不同的盒子里有不同字母的卡片。问：第1盒中还剩下哪张牌？

Response:

### 初始理解题目

我们有五个盒子，每个盒子里面有一些卡片，卡片上标有不同的字母。初始状态如下：

- 盒子1：E, S, X, T

- 盒子2：E, T, I, S

- 盒子3：T, S, E

- 盒子4：E

- 盒子5：E, S

**\*\*目标\*\*：**从每个盒子中取出一些卡片，使得最终每个盒子中**\*\*只剩下一张卡片\*\***，并且**\*\*所有盒子中剩下的卡片上的字母都是不同的\*\***。

### 分析当前状态

首先，我们需要注意到盒子4已经满足条件，因为它只有一张卡片E。因此，盒子4的E必须保留，不能被取出。这意味着其他盒子中不能保留E，因为每个字母只能出现一次。

### 确定保留的字母

我们需要为每个盒子选择一个字母，确保：

1. 每个盒子一个字母。

2. 五个字母互不相同。

3. 盒子4的E已经被保留，其他盒子不能保留E。

### 逐步选择字母

**\*\*盒子4\*\*：**已经确定为E。

**\*\*盒子5\*\*：**有E和S。E已经被盒子4保留，所以只能选择S。因此，盒子5保留S。

现在已保留的字母：E（盒子4），S（盒子5）。

**\*\*盒子3\*\*：**有T, S, E。S和E已经被保留，所以只能选择T。因此，盒子3保留T。

已保留的字母：E, S, T。

**\*\*盒子2\*\*：**有E, T, I, S。E, T, S已经被保留，所以只能选择I。因此，盒子2保留I。

已保留的字母：E, S, T, I。

**\*\*盒子1\*\*：**有E, S, X, T。E, S, T已经被保留，所以只能选择X。因此，盒子1保留X。

已保留的字母：E, S, T, I, X。

### 验证

让我们验证一下每个盒子保留的字母是否满足条件：

- 盒子1：X

- 盒子2：I

- 盒子3：T

- 盒子4：E

- 盒子5：S

所有字母X, I, T, E, S都是不同的，且每个盒子只有一张卡片。

### 可能的其他选择

我们需要确认是否存在其他可能的保留方式。例如：

如果盒子5保留E，那么盒子4必须保留其他字母，但盒子4只有E，所以无法改变。因此，盒子5必须保留S。

类似地，盒子3必须保留T，因为S和E已经被保留。

盒子2必须保留I，因为E, T, S已经被保留。

盒子1必须保留X，因为E, S, T已经被保留。

因此，这种保留方式是唯一的。

### 结论

根据以上分析，**\*\*第1盒中还剩下的牌是X\*\***。

1782  
1783  
1784  
1785  
1786  
1787  
1788  
1789  
1790  
1791  
1792  
1793  
1794  
1795  
1796  
1797  
1798  
1799  
1800  
1801  
1802  
1803  
1804  
1805  
1806  
1807  
1808  
1809  
1810  
1811  
1812  
1813  
1814  
1815  
1816  
1817  
1818  
1819  
1820  
1821  
1822  
1823  
1824  
1825  
1826  
1827  
1828  
1829  
1830  
1831  
1832  
1833  
1834  
1835

**Image:**



**Question:**

这会儿我买50块钱的菜能省多少钱？

**Response:**

根据图片中的时段表，当前时间为19:56，属于19:31至20:00的“全场七折”时段。因此，购买50元的菜可以享受七折优惠。

计算节省的金额：  
原价：50元  
折扣后价格：50元 × 0.7 = 35元  
节省金额：50元 - 35元 = 15元

所以，这会儿买50块钱的菜能省15元。

Image:

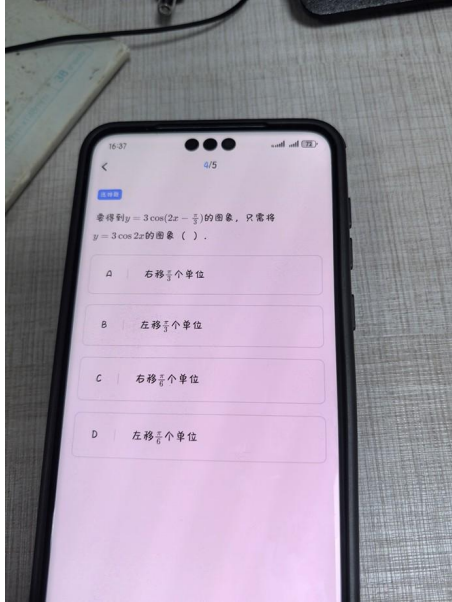

Question:

帮我解下这道题

Response:

要得到函数  $y = 3 \cos(2x - \frac{\pi}{3})$  的图象，只需将函数  $y = 3 \cos 2x$  的图象进行平移。我们需要确定平移的方向和距离。

### 解题步骤：

1. \*\*理解函数变换\*\*：

- 函数  $y = 3 \cos(2x - \frac{\pi}{3})$  可以看作是  $y = 3 \cos 2x$  的相位移动。
- 一般形式为  $y = A \cos(Bx - C)$ ，其中相位移动的距离为  $\frac{C}{B}$ 。

2. \*\*计算相位移动距离\*\*：

- 对于  $y = 3 \cos(2x - \frac{\pi}{3})$ ， $B = 2$ ， $C = \frac{\pi}{3}$ 。
- 相位移动距离为  $\frac{C}{B} = \frac{\frac{\pi}{3}}{2} = \frac{\pi}{6}$ 。

3. \*\*确定平移方向\*\*：

- 如果函数形式为  $y = 3 \cos(2x - \frac{\pi}{3})$ ，即  $C$  为正，表示图象向右平移。
- 如果函数形式为  $y = 3 \cos(2x + \frac{\pi}{3})$ ，即  $C$  为负，表示图象向左平移。

4. \*\*选择正确答案\*\*：

- 根据题目描述，函数形式为  $y = 3 \cos(2x - \frac{\pi}{3})$ ，所以图象应向右平移  $\frac{\pi}{6}$  个单位。

### 选项分析：

- \*\*A\*\*：右移  $\frac{\pi}{3}$  个单位 —— 错误，距离计算不正确。
- \*\*B\*\*：左移  $\frac{\pi}{3}$  个单位 —— 错误，方向和距离都不正确。
- \*\*C\*\*：右移  $\frac{\pi}{6}$  个单位 —— 正确，方向和距离都正确。
- \*\*D\*\*：左移  $\frac{\pi}{6}$  个单位 —— 错误，方向不正确。

### 最终答案：

**C**：右移  $\frac{\pi}{6}$  个单位。

Image:

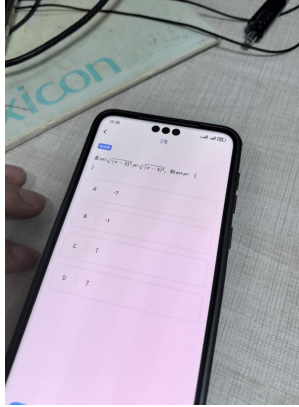

Question:

这题选啥?

Response:

这道选择题的题目是：

若  $(m = \sqrt[5]{(\pi - 3)^5})$ ,  $(n = \sqrt[4]{(\pi - 4)^4})$ , 则  $(m + n = )$  ( )

选项：

- A. -7
- B. -1
- C. 1
- D. 7

### 解题步骤：

1. \*\*计算  $(m)$  的值\*\*：

- $(m = \sqrt[5]{(\pi - 3)^5})$
- 由于  $(\pi \approx 3.1416)$ , 所以  $(\pi - 3 \approx 0.1416)$  (正数)。
- 奇数次根号的性质:  $(\sqrt[5]{x^5} = x)$  (无论  $(x)$  是正数还是负数)。
- 因此,  $(m = \pi - 3)$ 。

2. \*\*计算  $(n)$  的值\*\*：

- $(n = \sqrt[4]{(\pi - 4)^4})$
- $(\pi - 4 \approx -0.8584)$  (负数)。
- 偶数次根号的性质:  $(\sqrt[4]{x^4} = |x|)$  (结果为非负数)。
- 因此,  $(n = |\pi - 4| = 4 - \pi)$ 。

3. \*\*计算  $(m + n)$  的值\*\*：

- $(m + n = (\pi - 3) + (4 - \pi))$
- 化简:  $(\pi - 3 + 4 - \pi = 1)$ 。

### 结论：

$(m + n = 1)$ , 对应选项 \*\*C\*\*。

### 答案：

选 \*\*C\*\*。

Image:

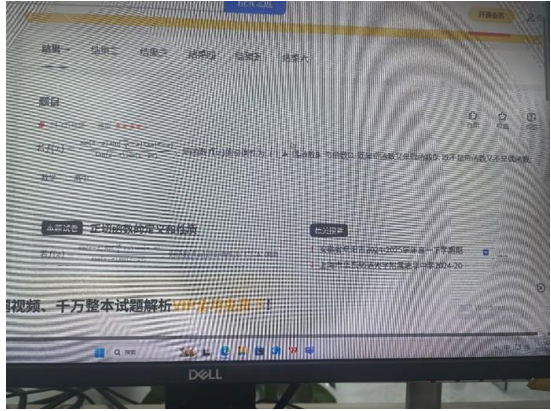

Question:

帮我解下这道题

Response:

题目要求判断函数  $f(x) = \frac{\sin(\pi - x) \sin\left(\frac{3\pi}{2} + x\right) \tan(\pi - x)}{\tan(x - \pi) \sin(x - 2\pi)}$  的奇偶性。以下是详细解答步骤：

### \*\*步骤 1：简化函数表达式\*\*

利用三角函数的周期性、奇偶性和恒等变换性质，逐步简化分子和分母：

1. \*\*分子部分\*\*：

- $\sin(\pi - x) = \sin x$  (正弦函数的性质)
- $\sin\left(\frac{3\pi}{2} + x\right) = -\cos x$  (诱导公式)
- $\tan(\pi - x) = -\tan x$  (正切函数的性质)

分子简化为：  
 $\sin x \cdot (-\cos x) \cdot (-\tan x) = \sin x \cos x \tan x$

2. \*\*分母部分\*\*：

- $\tan(x - \pi) = \tan x$  (正切函数的周期性)
- $\sin(x - 2\pi) = \sin x$  (正弦函数的周期性)

分母简化为：  
 $\tan x \cdot \sin x$

3. \*\*合并简化后的分子和分母\*\*：

$$f(x) = \frac{\sin x \cos x \tan x}{\tan x \sin x} = \cos x$$

### \*\*步骤 2：判断奇偶性\*\*

根据简化结果  $f(x) = \cos x$ ，分析其奇偶性：

- \*\*偶函数定义\*\*：  $f(-x) = f(x)$
- \*\*奇函数定义\*\*：  $f(-x) = -f(x)$

计算  $f(-x)$ ：  
 $f(-x) = \cos(-x) = \cos x = f(x)$

因此， $f(x)$  满足偶函数的定义。

### \*\*步骤 3：验证选项\*\*

题目选项为：

- A. 偶函数
- B. 奇函数
- C. 既是奇函数又是偶函数
- D. 既不是奇函数又不是偶函数

正确答案是 \*\*A\*\*。

### \*\*关键点总结\*\*

1. 通过三角恒等变换将复杂函数简化为基本形式  $\cos x$ 。
2. 偶函数的性质直接决定了答案。
3. 注意排除干扰项（如选项 C 要求  $f(x) \equiv 0$ ，但  $\cos x$  不满足）。

**最终答案**：  $\boxed{A}$
